# Supplementary material for: Subgroup analyses from patients with pre-treated metastatic colorectal cancer receiving trifluridine/tipiracil: results of the TALLISUR trial
Source: PubMed Central journal article supplement (PMC11267741; doi:10.1186/s12885-024-12599-7), 2024-07-23
Supplement: 12885_2024_12599_MOESM12_ESM.pdf [file 12885_2024_12599_MOESM12_ESM.pdf]

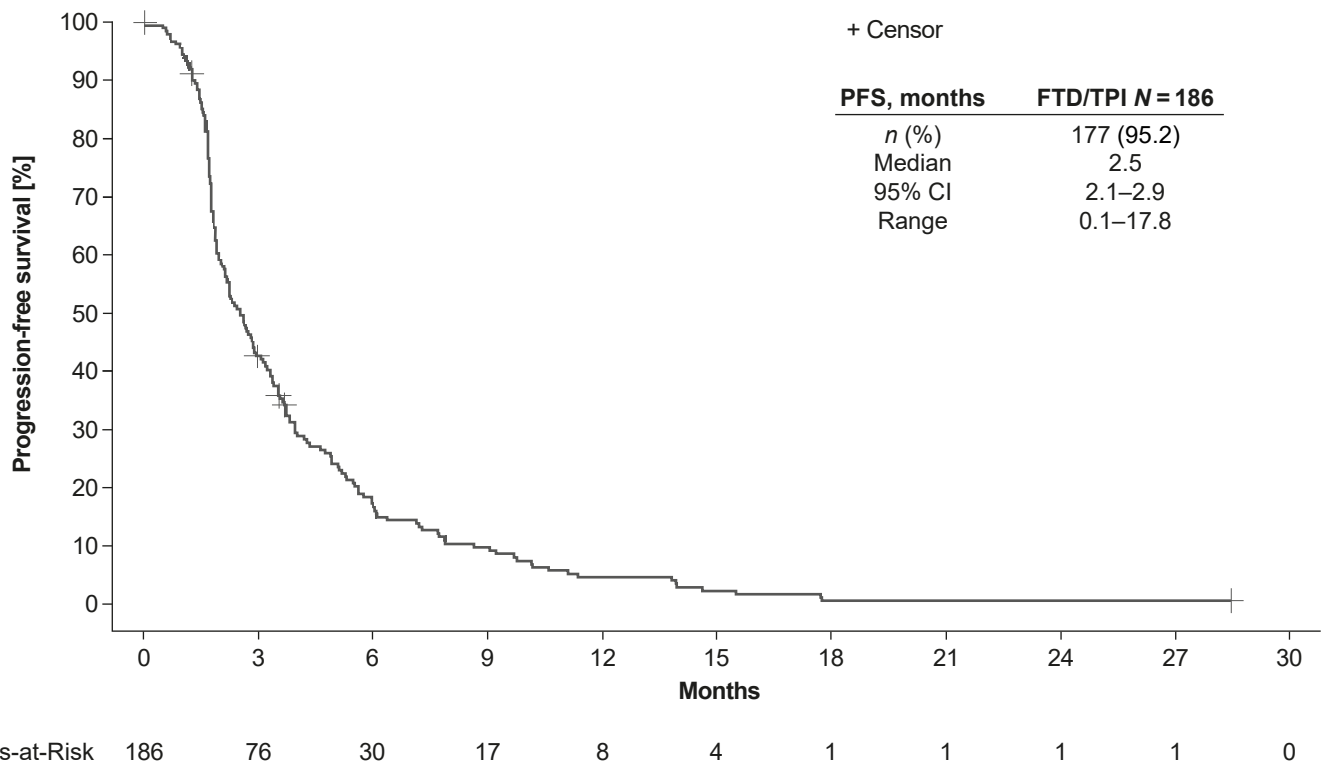

Supplementary Figure 2 Progression-free survival
